# Supplementary material for: Incidence of distal radius fracture in a general population in southern Sweden in 2016 compared with 2001
Source: Springer Nature journal article supplement (doi:10.1007/s00198-020-05282-7), 2020-01-13
Supplement: MOESM1 [file 17672024]

# **Incidence of Distal Radius Fracture in a General Population in Southern Sweden in 2016 Compared to 2001**

## **Osteoporosis International**

Muhanned Ali, MD<sup>1,4</sup>, Asa Eiriksdottir, MD<sup>1</sup>, Mustafa Murtadha, MD<sup>2</sup>, Anna Åkesson, BSc<sup>3</sup>,  
Isam Atroshi, MD, PhD<sup>1,4</sup>

<sup>1</sup>Department of Orthopedics, Kristianstad and Hässleholm Hospitals, Hässleholm, Sweden

<sup>2</sup>Department of Radiology, Kristianstad Hospital, Kristianstad, Sweden

<sup>3</sup>Clinical Studies Sweden – Forum South, Skåne University hospital, Lund, Sweden

<sup>4</sup>Department of Clinical Sciences - Orthopedics, Lund University, Lund, Sweden

Correspondence to: [muhannedalhashimi@hotmail.com](mailto:muhannedalhashimi@hotmail.com) or [muhanned.ali@skane.se](mailto:muhanned.ali@skane.se)

**Online Resource 1** Population at risk according to sex and age group for 2001 and 2016

---

| Sex   | Age group (years) | At-risk Population |             |        |             |
|-------|-------------------|--------------------|-------------|--------|-------------|
|       |                   | 2001               | Percentage* | 2016   | Percentage# |
| Women | 19-49             | 31547              | 24          | 33165  | 23          |
|       | 50-79             | 28132              | 22          | 31536  | 22          |
|       | 80-               | 6288               | 5           | 6584   | 5           |
| Men   | 19-49             | 32767              | 25          | 34819  | 25          |
|       | 50-79             | 26828              | 21          | 31729  | 22          |
|       | 80-               | 3532               | 3           | 4381   | 3           |
| Total |                   | 129094             |             | 142214 |             |

---

\* Percentage of total at-risk population 2001

# Percentage of total at-risk population 2016
