# Supplementary material for: Incidence of distal radius fracture in a general population in southern Sweden in 2016 compared with 2001
Source: Springer Nature journal article supplement (doi:10.1007/s00198-020-05282-7), 2020-01-13
Supplement: MOESM2 [file 17672024]

## Incidence of Distal Radius Fracture in a General Population in Southern Sweden in 2016 Compared to 2001

### Osteoporosis International

Muhanned Ali, MD<sup>1,4</sup>, Asa Eiriksdottir, MD<sup>1</sup>, Mustafa Murtadha, MD<sup>2</sup>, Anna Åkesson, BSc<sup>3</sup>, Isam Atroshi, MD, PhD<sup>1,4</sup>

<sup>1</sup>Department of Orthopedics, Kristianstad and Hässleholm Hospitals, Hässleholm, Sweden

<sup>2</sup>Department of Radiology, Kristianstad Hospital, Kristianstad, Sweden

<sup>3</sup>Clinical Studies Sweden – Forum South, Skåne University hospital, Lund, Sweden

<sup>4</sup>Department of Clinical Sciences - Orthopedics, Lund University, Lund, Sweden

Correspondence to: [muhannedalhashimi@hotmail.com](mailto:muhannedalhashimi@hotmail.com) or [muhanned.ali@skane.se](mailto:muhanned.ali@skane.se)

### Online Resource 2

| Fracture_date | Temperature_6am | Temperature_6pm |
|---------------|-----------------|-----------------|
| 2001-01-01    | -6              | 3               |
| 2001-01-01    | -6              | 3               |
| 2001-01-03    | 3,2             | 4,5             |
| 2001-01-03    | 3,2             | 4,5             |
| 2001-01-05    | 4,2             | 4,9             |
| 2001-01-05    | 4,2             | 4,9             |
| 2001-01-06    | 5,3             | 5               |
| 2001-01-08    | 5,1             | 4               |
| 2001-01-09    | 5               | 2,9             |
| 2001-01-10    | 3,2             | -1,9            |
| 2001-01-11    | -2,2            | 1,7             |
| 2001-01-11    | -2,2            | 1,7             |
| 2001-01-13    | -3,6            | 0,9             |
| 2001-01-13    | -3,6            | 0,9             |
| 2001-01-14    | -1,9            | -3,1            |
| 2001-01-14    | -1,9            | -3,1            |
| 2001-01-14    | -1,9            | -3,1            |
| 2001-01-17    | -0,8            | 1               |
| 2001-01-18    | 1,1             | 0,3             |
| 2001-01-18    | 1,1             | 0,3             |
| 2001-01-18    | 1,1             | 0,3             |
| 2001-01-19    | 1               | 1,3             |
| 2001-01-22    | 0,8             | 0,2             |
| 2001-01-23    | 0,3             | 1,3             |
| 2001-01-23    | 0,3             | 1,3             |
| 2001-01-24    | 3,2             | 5,1             |
| 2001-01-27    | 0,7             | 2,1             |
| 2001-01-28    | 2,3             | 3,2             |
| 2001-01-29    | 2,2             | 0,1             |
| 2001-01-30    | 2,3             | 1,8             |
| 2001-01-30    | 2,3             | 1,8             |
| 2001-02-02    | -10             | -5,2            |
| 2001-02-02    | -10             | -5,2            |

|            |       |      |
|------------|-------|------|
| 2001-02-02 | -10   | -5,2 |
| 2001-02-04 | -8,2  | -7,4 |
| 2001-02-04 | -8,2  | -7,4 |
| 2001-02-05 | -6,8  | -1,4 |
| 2001-02-05 | -6,8  | -1,4 |
| 2001-02-05 | -6,8  | -1,4 |
| 2001-02-05 | -6,8  | -1,4 |
| 2001-02-06 | -0,9  | 6,1  |
| 2001-02-07 | 5,4   | 5,3  |
| 2001-02-08 | 2,7   | 7,4  |
| 2001-02-10 | -4,7  | -2,2 |
| 2001-02-11 | 0,6   | 6,9  |
| 2001-02-13 | 1,7   | 2,7  |
| 2001-02-13 | 1,7   | 2,7  |
| 2001-02-13 | 1,7   | 2,7  |
| 2001-02-18 | 3,2   | 1,9  |
| 2001-02-18 | 3,2   | 1,9  |
| 2001-02-19 | 0     | 2,2  |
| 2001-02-19 | 0     | 2,2  |
| 2001-02-22 | 0,1   | 0,2  |
| 2001-02-23 | -6,2  | -6   |
| 2001-02-24 | -12,8 | -7,4 |
| 2001-02-24 | -12,8 | -7,4 |
| 2001-02-25 | -0,9  | -2   |
| 2001-02-26 | -2,9  | -3,1 |
| 2001-02-26 | -2,9  | -3,1 |
| 2001-02-26 | -2,9  | -3,1 |
| 2001-02-26 | -2,9  | -3,1 |
| 2001-02-26 | -2,9  | -3,1 |
| 2001-02-27 | -5,4  | -2,2 |
| 2001-02-27 | -5,4  | -2,2 |
| 2001-02-28 | -4,8  | -0,3 |
| 2001-02-28 | -4,8  | -0,3 |
| 2001-03-01 | -0,4  | -0,3 |
| 2001-03-05 | -10,2 | -1,6 |
| 2001-03-05 | -10,2 | -1,6 |
| 2001-03-05 | -10,2 | -1,6 |
| 2001-03-07 | -8,1  | 1    |
| 2001-03-07 | -8,1  | 1    |
| 2001-03-08 | 0,2   | 1,8  |
| 2001-03-13 | -1,4  | 2,4  |
| 2001-03-13 | -1,4  | 2,4  |
| 2001-03-14 | 1,9   | 3,9  |
| 2001-03-15 | 3,5   | 3    |
| 2001-03-16 | 2     | 2    |
| 2001-03-17 | 0,5   | 1    |
| 2001-03-18 | -1,3  | -0,6 |
| 2001-03-18 | -1,3  | -0,6 |
| 2001-03-19 | -2,3  | -2,8 |
| 2001-03-19 | -2,3  | -2,8 |

|            |      |      |
|------------|------|------|
| 2001-03-19 | -2,3 | -2,8 |
| 2001-03-20 | -3,1 | -0,7 |
| 2001-03-20 | -3,1 | -0,7 |
| 2001-03-21 | -6,1 | 0,2  |
| 2001-03-22 | -5,9 | 0,4  |
| 2001-03-22 | -5,9 | 0,4  |
| 2001-03-22 | -5,9 | 0,4  |
| 2001-03-25 | -0,8 | -0,1 |
| 2001-03-27 | -4,1 | -0,8 |
| 2001-03-29 | 2,1  | 3,2  |
| 2001-04-01 | 8,2  | 9,2  |
| 2001-04-02 | 3,3  | 8,9  |
| 2001-04-03 | 5,4  | 10,4 |
| 2001-04-03 | 5,4  | 10,4 |
| 2001-04-04 | 2,3  | 5,4  |
| 2001-04-05 | 5,9  | 6,2  |
| 2001-04-06 | 3,7  | 6,5  |
| 2001-04-07 | 6,3  | 7,2  |
| 2001-04-08 | 6,4  | 7,8  |
| 2001-04-11 | 0    | 5,3  |
| 2001-04-11 | 0    | 5,3  |
| 2001-04-13 | 1    | 3,1  |
| 2001-04-14 | -1,8 | 3,1  |
| 2001-04-15 | -1,1 | 2,7  |
| 2001-04-17 | 2,2  | 6,5  |
| 2001-04-20 | 0,6  | 5,6  |
| 2001-04-20 | 0,6  | 5,6  |
| 2001-04-20 | 0,6  | 5,6  |
| 2001-04-21 | 5,8  | 6,4  |
| 2001-04-21 | 5,8  | 6,4  |
| 2001-04-23 | 4,6  | 7,2  |
| 2001-04-25 | 4,7  | 6,3  |
| 2001-04-26 | 6,9  | 10,5 |
| 2001-04-28 | 6,8  | 9    |
| 2001-04-28 | 6,8  | 9    |
| 2001-04-29 | 7    | 9,9  |
| 2001-05-01 | 8,2  | 10,8 |
| 2001-05-05 | 8,9  | 11,8 |
| 2001-05-06 | 6,8  | 11,3 |
| 2001-05-08 | 7,1  | 13,2 |
| 2001-05-10 | 10,1 | 13,8 |
| 2001-05-10 | 10,1 | 21   |
| 2001-05-10 | 10,1 | 21   |
| 2001-05-13 | 13,8 | 20   |
| 2001-05-13 | 13,8 | 20   |
| 2001-05-13 | 13,8 | 20   |
| 2001-05-14 | 12,1 | 19,2 |
| 2001-05-17 | 12,8 | 16,5 |
| 2001-05-17 | 12,8 | 16,5 |
| 2001-05-18 | 11,8 | 11,2 |

|            |      |      |
|------------|------|------|
| 2001-05-19 | 8,9  | 11,5 |
| 2001-05-20 | 10,1 | 11,9 |
| 2001-05-21 | 10,7 | 14   |
| 2001-05-21 | 10,7 | 14   |
| 2001-05-23 | 12,7 | 15,9 |
| 2001-05-23 | 12,7 | 15,9 |
| 2001-05-25 | 9,8  | 16,4 |
| 2001-05-26 | 9,3  | 17,8 |
| 2001-05-26 | 9,3  | 17,8 |
| 2001-05-27 | 13,9 | 17,2 |
| 2001-05-27 | 13,9 | 17,2 |
| 2001-05-27 | 13,9 | 17,2 |
| 2001-05-28 | 14,9 | 16   |
| 2001-05-28 | 14,9 | 16   |
| 2001-05-29 | 13,2 | 12,1 |
| 2001-06-03 | 11   | 10,4 |
| 2001-06-08 | 9,6  | 12   |
| 2001-06-08 | 9,6  | 12   |
| 2001-06-13 | 12   | 16   |
| 2001-06-13 | 12   | 16   |
| 2001-06-13 | 12   | 16   |
| 2001-06-14 | 12   | 16   |
| 2001-06-14 | 12   | 16   |
| 2001-06-15 | 12,2 | 17,8 |
| 2001-06-18 | 14,8 | 15,8 |
| 2001-06-18 | 14,8 | 15,8 |
| 2001-06-19 | 15,8 | 20   |
| 2001-06-21 | 13   | 16,2 |
| 2001-06-21 | 13   | 16,2 |
| 2001-06-22 | 14   | 15   |
| 2001-06-25 | 14,7 | 21   |
| 2001-06-25 | 14,7 | 21   |
| 2001-06-25 | 14,7 | 21   |
| 2001-06-25 | 14,7 | 21   |
| 2001-06-25 | 14,7 | 21   |
| 2001-06-25 | 14,7 | 21   |
| 2001-06-27 | 18   | 22   |
| 2001-06-27 | 18   | 22   |
| 2001-06-29 | 18   | 22,8 |
| 2001-07-02 | 17   | 21,8 |
| 2001-07-03 | 17   | 21,3 |
| 2001-07-04 | 17   | 21   |
| 2001-07-04 | 17   | 21   |
| 2001-07-05 | 16,8 | 22,6 |
| 2001-07-06 | 16,2 | 24,2 |
| 2001-07-08 | 24,2 | 22,8 |
| 2001-07-09 | 21,4 | 22   |
| 2001-07-09 | 21,4 | 22   |
| 2001-07-11 | 16,7 | 17   |
| 2001-07-15 | 18,5 | 18,2 |

|            |      |      |
|------------|------|------|
| 2001-07-15 | 18,5 | 18,2 |
| 2001-07-15 | 18,5 | 18,2 |
| 2001-07-16 | 14   | 12,1 |
| 2001-07-17 | 13,7 | 18   |
| 2001-07-20 | 19,1 | 20,4 |
| 2001-07-20 | 19,1 | 20,4 |
| 2001-07-21 | 16,7 | 19,6 |
| 2001-07-21 | 16,7 | 19,6 |
| 2001-07-21 | 16,7 | 19,6 |
| 2001-07-23 | 18,4 | 22,2 |
| 2001-07-23 | 18,4 | 22,2 |
| 2001-07-25 | 18,2 | 22,7 |
| 2001-07-25 | 18,2 | 22,7 |
| 2001-07-26 | 18,5 | 21,7 |
| 2001-07-26 | 18,5 | 21,7 |
| 2001-07-26 | 18,5 | 21,7 |
| 2001-07-29 | 19,4 | 23,2 |
| 2001-07-29 | 19,4 | 23,2 |
| 2001-07-30 | 19,8 | 20,2 |
| 2001-08-01 | 15,8 | 18   |
| 2001-08-02 | 16   | 20,2 |
| 2001-08-02 | 16   | 20,2 |
| 2001-08-08 | 16,7 | 18,2 |
| 2001-08-11 | 13,7 | 14,8 |
| 2001-08-13 | 16,3 | 19,4 |
| 2001-08-16 | 18,5 | 22   |
| 2001-08-18 | 14,4 | 18,2 |
| 2001-08-18 | 14,4 | 18,2 |
| 2001-08-19 | 14,9 | 15,8 |
| 2001-08-20 | 16,7 | 17,8 |
| 2001-08-21 | 16,7 | 21,8 |
| 2001-08-21 | 16,7 | 21,8 |
| 2001-08-23 | 17,4 | 18   |
| 2001-08-24 | 16,4 | 17,5 |
| 2001-08-24 | 16,4 | 17,5 |
| 2001-08-24 | 16,4 | 17,5 |
| 2001-08-25 | 16,2 | 17,9 |
| 2001-08-25 | 16,2 | 17,9 |
| 2001-08-25 | 16,2 | 17,9 |
| 2001-08-28 | 11,1 | 10,7 |
| 2001-08-28 | 11,1 | 10,7 |
| 2001-08-28 | 11,1 | 10,7 |
| 2001-08-30 | 9,4  | 15   |
| 2001-08-30 | 9,4  | 15   |
| 2001-08-30 | 9,4  | 15   |
| 2001-08-30 | 9,4  | 15   |
| 2001-08-31 | 13,9 | 16,4 |
| 2001-09-01 | 15,8 | 16,9 |
| 2001-09-01 | 15,8 | 16,9 |
| 2001-09-02 | 13,9 | 14,9 |

|            |      |      |
|------------|------|------|
| 2001-09-05 | 12,3 | 13,6 |
| 2001-09-05 | 12,3 | 13,6 |
| 2001-09-07 | 10,9 | 12,2 |
| 2001-09-08 | 10,4 | 11   |
| 2001-09-08 | 10,4 | 11   |
| 2001-09-09 | 11   | 13   |
| 2001-09-09 | 11   | 13   |
| 2001-09-09 | 11   | 13   |
| 2001-09-10 | 11,4 | 11,8 |
| 2001-09-11 | 10,4 | 11,8 |
| 2001-09-12 | 9,6  | 13,8 |
| 2001-09-14 | 11,2 | 10,2 |
| 2001-09-14 | 11,2 | 10,2 |
| 2001-09-14 | 11,2 | 10,2 |
| 2001-09-15 | 11   | 13,3 |
| 2001-09-16 | 10,6 | 12,8 |
| 2001-09-17 | 14,8 | 12,8 |
| 2001-09-17 | 14,8 | 12,8 |
| 2001-09-19 | 11,9 | 11,3 |
| 2001-09-21 | 12,9 | 12   |
| 2001-09-22 | 12   | 12,7 |
| 2001-09-23 | 11,5 | 11,8 |
| 2001-09-24 | 11,2 | 10,9 |
| 2001-09-25 | 9,3  | 9,6  |
| 2001-09-27 | 7,1  | 10,9 |
| 2001-09-27 | 7,1  | 10,9 |
| 2001-10-01 | 12,2 | 13,9 |
| 2001-10-05 | 9,9  | 10,8 |
| 2001-10-10 | 12,4 | 12,6 |
| 2001-10-12 | 14,1 | 15,2 |
| 2001-10-12 | 14,1 | 15,2 |
| 2001-10-13 | 13,1 | 14,4 |
| 2001-10-14 | 13,2 | 13   |
| 2001-10-17 | 8,9  | 7,6  |
| 2001-10-17 | 8,9  | 7,6  |
| 2001-10-22 | 9,1  | 9    |
| 2001-10-22 | 9,1  | 9    |
| 2001-10-23 | 6,2  | 7,9  |
| 2001-10-25 | 6,2  | 9,4  |
| 2001-10-27 | 11,1 | 11,5 |
| 2001-10-30 | 12,2 | 12,9 |
| 2001-11-04 | 7,7  | 9,1  |
| 2001-11-04 | 7,7  | 9,1  |
| 2001-11-06 | 5,1  | 6,3  |
| 2001-11-06 | 5,1  | 6,3  |
| 2001-11-08 | 4    | -0,2 |
| 2001-11-09 | 0,2  | -1,1 |
| 2001-11-10 | 0,2  | 7,2  |
| 2001-11-11 | 8,4  | 8,1  |
| 2001-11-12 | 6,9  | 2,9  |

|            |       |       |
|------------|-------|-------|
| 2001-11-13 | -2,3  | -1,1  |
| 2001-11-14 | -3,6  | -2,9  |
| 2001-11-17 | 5,7   | 6,1   |
| 2001-11-18 | 3,2   | 7,4   |
| 2001-11-21 | 6,3   | 9,6   |
| 2001-11-24 | -1,9  | -1,8  |
| 2001-11-24 | -1,9  | -1,8  |
| 2001-11-26 | 4,2   | 2     |
| 2001-11-27 | 0,8   | 3,8   |
| 2001-11-30 | 4,1   | 2,1   |
| 2001-11-30 | 4,1   | 2,1   |
| 2001-11-30 | 4,1   | 2,1   |
| 2001-12-01 | 2,2   | 3,1   |
| 2001-12-02 | 2,6   | 3,1   |
| 2001-12-03 | 3,4   | 2,9   |
| 2001-12-04 | 2,1   | 1,6   |
| 2001-12-04 | 2,1   | 1,6   |
| 2001-12-05 | 3,2   | 5,8   |
| 2001-12-08 | 1,1   | 3     |
| 2001-12-09 | 2,8   | 3,9   |
| 2001-12-10 | 6,4   | 6,2   |
| 2001-12-10 | 6,4   | 6,2   |
| 2001-12-10 | 6,4   | 6,2   |
| 2001-12-11 | 2     | 3     |
| 2001-12-11 | 2     | 3     |
| 2001-12-11 | 2     | 3     |
| 2001-12-14 | 1,2   | 1,5   |
| 2001-12-16 | -2,8  | -0,4  |
| 2001-12-16 | -2,8  | -0,4  |
| 2001-12-20 | -6,9  | -2,1  |
| 2001-12-21 | 2,1   | -3,2  |
| 2001-12-21 | 2,1   | -3,2  |
| 2001-12-21 | 2,1   | -3,2  |
| 2001-12-22 | -9,7  | -10,1 |
| 2001-12-23 | -11,4 | -9,9  |
| 2001-12-23 | -11,4 | -9,9  |
| 2001-12-24 | 0,1   | 2,6   |
| 2001-12-24 | 0,1   | 2,6   |
| 2001-12-24 | 0,1   | 2,6   |
| 2001-12-25 | 3,1   | 0,4   |
| 2001-12-25 | 3,1   | 0,4   |
| 2001-12-25 | 3,1   | 0,4   |
| 2001-12-26 | -1,8  | -2,3  |
| 2001-12-26 | -1,8  | -2,3  |
| 2001-12-26 | -1,8  | -2,3  |
| 2001-12-27 | -5,5  | 0,1   |
| 2001-12-27 | -5,5  | 0,1   |
| 2001-12-27 | -5,5  | 0,1   |
| 2001-12-27 | -5,5  | 0,1   |
| 2001-12-29 | -0,3  | -1,9  |

|            |       |       |
|------------|-------|-------|
| 2001-12-29 | -0,3  | -1,9  |
| 2001-12-31 | -15,8 | -17,5 |
| 2016-01-02 | -0,6  | -2,6  |
| 2016-01-02 | -0,6  | -2,6  |
| 2016-01-03 | -2,7  | -2,4  |
| 2016-01-03 | -2,7  | -2,4  |
| 2016-01-04 | -2,4  | 0,1   |
| 2016-01-05 | -3,3  | -6,2  |
| 2016-01-05 | -3,3  | -6,2  |
| 2016-01-07 | -8,5  | -1,4  |
| 2016-01-08 | 1     | 0,2   |
| 2016-01-08 | 1     | 0,2   |
| 2016-01-09 | -1,5  | 2,6   |
| 2016-01-09 | -1,5  | 2,6   |
| 2016-01-09 | -1,5  | 2,6   |
| 2016-01-11 | 2,3   | 2,8   |
| 2016-01-14 | -5,6  | -4    |
| 2016-01-14 | -5,6  | -4    |
| 2016-01-14 | -5,6  | -4    |
| 2016-01-14 | -5,6  | -4    |
| 2016-01-14 | -5,6  | -4    |
| 2016-01-14 | -5,6  | -4    |
| 2016-01-14 | -5,6  | -4    |
| 2016-01-14 | -5,6  | -4    |
| 2016-01-14 | -5,6  | -4    |
| 2016-01-14 | -5,6  | -4    |
| 2016-01-15 | -4,2  | -7,6  |
| 2016-01-15 | -4,2  | -7,6  |
| 2016-01-16 | -11,4 | -8,5  |
| 2016-01-16 | -11,4 | -8,5  |
| 2016-01-16 | -11,4 | -8,5  |
| 2016-01-17 | -9,1  | -8,8  |
| 2016-01-17 | -9,1  | -8,8  |
| 2016-01-19 | -1,5  | -1    |
| 2016-01-19 | -1,5  | -1    |
| 2016-01-19 | -1,5  | -1    |
| 2016-01-21 | -14   | -7,5  |
| 2016-01-23 | -3,5  | -2    |
| 2016-01-23 | -3,5  | -2    |
| 2016-01-25 | 1,5   | 3     |
| 2016-01-25 | 1,5   | 3     |
| 2016-01-26 | 6     | 4,5   |
| 2016-01-26 | 6     | 4,5   |
| 2016-01-28 | 6     | 4     |
| 2016-01-28 | 6     | 4     |
| 2016-01-31 | 2,2   | 2,4   |
| 2016-02-01 | 1     | 7,3   |
| 2016-02-01 | 1     | 7,3   |
| 2016-02-01 | 1     | 7,3   |
| 2016-02-01 | 1     | 7,3   |
| 2016-02-01 | 1     | 7,3   |



|            |      |      |
|------------|------|------|
| 2016-02-01 | 1    | 7,3  |
| 2016-02-02 | 5,1  | 5,5  |
| 2016-02-02 | 5,1  | 5,5  |
| 2016-02-03 | 5,3  | 3    |
| 2016-02-04 | 2,7  | 1    |
| 2016-02-04 | 2,7  | 1    |
| 2016-02-11 | 2,2  | 3,2  |
| 2016-02-12 | 1    | -1,4 |
| 2016-02-13 | -1,6 | -1,5 |
| 2016-02-13 | -1,6 | -1,5 |
| 2016-02-13 | -1,6 | -1,5 |
| 2016-02-14 | -0,1 | 1,1  |
| 2016-02-15 | -0,8 | -1,1 |
| 2016-02-16 | -6,9 | -3,4 |
| 2016-02-16 | -6,9 | -3,4 |
| 2016-02-16 | -6,9 | -3,4 |
| 2016-02-17 | -7,4 | 1,1  |
| 2016-02-17 | -7,4 | 1,1  |
| 2016-02-18 | 0,1  | 0,7  |
| 2016-02-18 | 0,1  | 0,7  |
| 2016-02-18 | 0,1  | 0,7  |
| 2016-02-20 | 0,9  | 3,2  |
| 2016-02-22 | 2,9  | 3,8  |
| 2016-02-22 | 2,9  | 3,8  |
| 2016-02-23 | 3,7  | 3,1  |
| 2016-02-24 | 0,1  | -0,6 |
| 2016-02-24 | 0,1  | -0,6 |
| 2016-02-24 | 0,1  | -0,6 |
| 2016-02-25 | 0,8  | 1,5  |
| 2016-02-26 | 0,4  | 0,5  |
| 2016-02-26 | 0,4  | 0,5  |
| 2016-02-28 | -1,2 | -0,4 |
| 2016-02-28 | -1,2 | -0,4 |
| 2016-02-29 | -2,8 | -2,3 |
| 2016-02-29 | -2,8 | -2,3 |
| 2016-02-29 | -2,8 | -2,3 |
| 2016-03-03 | 0,4  | 2    |
| 2016-03-03 | 0,4  | 2    |
| 2016-03-03 | 0,4  | 2    |
| 2016-03-05 | 0,6  | 2,5  |
| 2016-03-05 | 0,6  | 2,5  |
| 2016-03-09 | -1,5 | 1    |
| 2016-03-10 | 2,2  | -0,5 |
| 2016-03-12 | -2,4 | -0,1 |
| 2016-03-14 | 2,4  | 4,6  |
| 2016-03-15 | 5,6  | 2,5  |
| 2016-03-15 | 5,6  | 2,5  |
| 2016-03-16 | -3,5 | 4,8  |
| 2016-03-16 | -3,5 | 4,8  |
| 2016-03-16 | -3,5 | 4,8  |

|            |      |      |
|------------|------|------|
| 2016-03-17 | -0,7 | 4,1  |
| 2016-03-18 | 2,6  | 2    |
| 2016-03-19 | 1,2  | 4    |
| 2016-03-20 | 0,6  | 6,4  |
| 2016-03-20 | 0,6  | 6,4  |
| 2016-03-24 | 2,6  | 3,4  |
| 2016-03-27 | 4,9  | 8,6  |
| 2016-03-27 | 4,9  | 8,6  |
| 2016-03-29 | 3,7  | 6,2  |
| 2016-03-30 | 2,6  | 4,7  |
| 2016-04-01 | 1,6  | 5,6  |
| 2016-04-03 | 3,9  | 6,4  |
| 2016-04-03 | 3,9  | 6,4  |
| 2016-04-03 | 3,9  | 6,4  |
| 2016-04-03 | 3,9  | 6,4  |
| 2016-04-05 | 5,3  | 11,6 |
| 2016-04-06 | 7,3  | 8,7  |
| 2016-04-07 | 5,7  | 7,9  |
| 2016-04-09 | 2,6  | 8    |
| 2016-04-09 | 2,6  | 8    |
| 2016-04-10 | 0,5  | 6,9  |
| 2016-04-12 | 4    | 8,5  |
| 2016-04-12 | 4    | 8,5  |
| 2016-04-14 | 5,4  | 6,5  |
| 2016-04-14 | 5,4  | 6,5  |
| 2016-04-16 | 7,1  | 10,7 |
| 2016-04-17 | 6,3  | 6,5  |
| 2016-04-22 | 6,5  | 8,7  |
| 2016-04-22 | 6,5  | 8,7  |
| 2016-04-23 | 3,6  | 4,1  |
| 2016-04-24 | -0,2 | 2,4  |
| 2016-04-27 | 2,4  | 5    |
| 2016-04-30 | 8,8  | 8,6  |
| 2016-04-30 | 8,8  | 8,6  |
| 2016-04-30 | 8,8  | 8,6  |
| 2016-04-30 | 8,8  | 8,6  |
| 2016-04-30 | 8,8  | 8,6  |
| 2016-04-30 | 8,8  | 8,6  |
| 2016-05-01 | 7,8  | 9,6  |
| 2016-05-03 | 10,2 | 10   |
| 2016-05-05 | 7,9  | 11,6 |
| 2016-05-05 | 7,9  | 11,6 |
| 2016-05-05 | 7,9  | 11,6 |
| 2016-05-06 | 9,2  | 11,6 |
| 2016-05-07 | 12,4 | 13,2 |
| 2016-05-10 | 15,9 | 15,7 |
| 2016-05-11 | 12,4 | 12,6 |
| 2016-05-12 | 10,2 | 11   |
| 2016-05-12 | 10,2 | 11   |
| 2016-05-12 | 10,2 | 11   |

|            |      |      |
|------------|------|------|
| 2016-05-14 | 9,1  | 12   |
| 2016-05-14 | 9,1  | 12   |
| 2016-05-14 | 9,1  | 12   |
| 2016-05-21 | 11,3 | 16,6 |
| 2016-05-22 | 16,4 | 16,8 |
| 2016-05-22 | 16,4 | 16,8 |
| 2016-05-25 | 14,9 | 14,2 |
| 2016-05-26 | 12,8 | 14,5 |
| 2016-05-27 | 9,9  | 15,4 |
| 2016-05-27 | 9,9  | 15,4 |
| 2016-05-27 | 9,9  | 15,4 |
| 2016-05-27 | 9,9  | 15,4 |
| 2016-05-29 | 15,8 | 18,6 |
| 2016-05-30 | 19,7 | 22,8 |
| 2016-05-31 | 18,5 | 22,8 |
| 2016-06-01 | 21,2 | 22,5 |
| 2016-06-02 | 19   | 20,8 |
| 2016-06-02 | 19   | 20,8 |
| 2016-06-03 | 20   | 19,5 |
| 2016-06-04 | 20,4 | 15,4 |
| 2016-06-06 | 15   | 13,4 |
| 2016-06-06 | 15   | 13,4 |
| 2016-06-07 | 14,5 | 17,8 |
| 2016-06-11 | 10,2 | 13,4 |
| 2016-06-11 | 10,2 | 13,4 |
| 2016-06-13 | 13,7 | 13,7 |
| 2016-06-14 | 14,3 | 13,7 |
| 2016-06-19 | 15   | 16,6 |
| 2016-06-20 | 14,5 | 16,5 |
| 2016-06-23 | 20,4 | 20,7 |
| 2016-06-25 | 19,3 | 24,3 |
| 2016-06-26 | 20,2 | 18,6 |
| 2016-06-26 | 20,2 | 18,6 |
| 2016-06-27 | 17,6 | 19,1 |
| 2016-06-27 | 17,6 | 19,1 |
| 2016-06-28 | 17   | 18   |
| 2016-06-28 | 17   | 18   |
| 2016-07-01 | 17   | 17,4 |
| 2016-07-03 | 14,3 | 14,6 |
| 2016-07-04 | 13,5 | 17   |
| 2016-07-04 | 13,5 | 17   |
| 2016-07-05 | 14,8 | 16,4 |
| 2016-07-06 | 13,8 | 14,2 |
| 2016-07-07 | 14,8 | 16,3 |
| 2016-07-08 | 16,4 | 17,9 |
| 2016-07-09 | 15,6 | 19   |
| 2016-07-10 | 15,5 | 20,5 |
| 2016-07-11 | 18   | 19   |
| 2016-07-13 | 15,8 | 18,1 |
| 2016-07-13 | 15,8 | 18,1 |

|            |      |      |
|------------|------|------|
| 2016-07-15 | 17   | 18,2 |
| 2016-07-15 | 17   | 18,2 |
| 2016-07-15 | 17   | 18,2 |
| 2016-07-19 | 15,8 | 20,8 |
| 2016-07-19 | 15,8 | 20,8 |
| 2016-07-23 | 18,6 | 21,3 |
| 2016-07-25 | 18,8 | 20,2 |
| 2016-07-27 | 15,9 | 19,4 |
| 2016-07-28 | 18,4 | 19,9 |
| 2016-07-28 | 18,4 | 19,9 |
| 2016-07-28 | 18,4 | 19,9 |
| 2016-07-29 | 14,2 | 18,5 |
| 2016-07-31 | 14,5 | 15,9 |
| 2016-08-01 | 14,5 | 15   |
| 2016-08-02 | 14,3 | 15,4 |
| 2016-08-02 | 14,3 | 15,4 |
| 2016-08-04 | 17,5 | 19,8 |
| 2016-08-05 | 15,6 | 18,2 |
| 2016-08-10 | 11   | 10,6 |
| 2016-08-13 | 16,5 | 16,3 |
| 2016-08-14 | 15,5 | 17   |
| 2016-08-17 | 11,3 | 18   |
| 2016-08-19 | 14,6 | 15,8 |
| 2016-08-21 | 14,9 | 16,5 |
| 2016-08-23 | 17,2 | 18,3 |
| 2016-08-24 | 14,1 | 17,6 |
| 2016-08-26 | 18,1 | 23   |
| 2016-08-26 | 18,1 | 23   |
| 2016-08-27 | 15,1 | 17,1 |
| 2016-08-31 | 14,3 | 17,2 |
| 2016-08-31 | 14,3 | 17,2 |
| 2016-09-01 | 13,6 | 16,2 |
| 2016-09-02 | 13,9 | 17,3 |
| 2016-09-02 | 13,9 | 17,3 |
| 2016-09-04 | 13,7 | 14,9 |
| 2016-09-05 | 13,5 | 14,1 |
| 2016-09-10 | 10,8 | 16,2 |
| 2016-09-10 | 10,8 | 16,2 |
| 2016-09-11 | 17,5 | 17,3 |
| 2016-09-13 | 15,1 | 15,4 |
| 2016-09-14 | 12,6 | 16,7 |
| 2016-09-15 | 13,5 | 16,5 |
| 2016-09-16 | 15,5 | 15,5 |
| 2016-09-16 | 15,5 | 15,5 |
| 2016-09-16 | 15,5 | 15,5 |
| 2016-09-17 | 12,9 | 15,2 |
| 2016-09-18 | 11,1 | 11,6 |
| 2016-09-22 | 5,1  | 11,8 |
| 2016-09-25 | 8,5  | 14,4 |
| 2016-09-27 | 6,4  | 14,8 |

|            |      |      |
|------------|------|------|
| 2016-09-29 | 16   | 15,1 |
| 2016-09-30 | 12   | 8,6  |
| 2016-10-03 | 11,7 | 11,5 |
| 2016-10-04 | 6,1  | 7,4  |
| 2016-10-06 | 9,7  | 10,3 |
| 2016-10-07 | 9,6  | 11   |
| 2016-10-07 | 9,6  | 11   |
| 2016-10-11 | 7,5  | 7,5  |
| 2016-10-14 | 6,7  | 8,1  |
| 2016-10-18 | 8,1  | 8,6  |
| 2016-10-18 | 8,1  | 8,6  |
| 2016-10-21 | 7,5  | 6,5  |
| 2016-10-23 | 5    | 6,5  |
| 2016-10-24 | 6,2  | 8,2  |
| 2016-10-25 | 6,3  | 5    |
| 2016-10-26 | 0,6  | 5,3  |
| 2016-10-27 | 8,4  | 9,8  |
| 2016-10-29 | 7,2  | 5,4  |
| 2016-10-29 | 7,2  | 5,4  |
| 2016-10-30 | 1,9  | 5,2  |
| 2016-10-30 | 1,9  | 5,2  |
| 2016-10-31 | 2,9  | 7,8  |
| 2016-10-31 | 2,9  | 7,8  |
| 2016-11-05 | 6,3  | 5,6  |
| 2016-11-06 | 3,2  | 1,8  |
| 2016-11-06 | 3,2  | 1,8  |
| 2016-11-07 | 0,1  | -2,6 |
| 2016-11-08 | -5   | -2,3 |
| 2016-11-13 | -9,8 | -4,5 |
| 2016-11-13 | -9,8 | -4,5 |
| 2016-11-14 | -7,8 | -0,6 |
| 2016-11-20 | 2,1  | 7,3  |
| 2016-11-22 | 8,5  | 7,3  |
| 2016-11-22 | 8,5  | 7,3  |
| 2016-11-23 | 5,2  | 7,5  |
| 2016-11-25 | -1,5 | 4,1  |
| 2016-11-27 | 1,6  | 2,4  |
| 2016-11-28 | -1,9 | -2   |
| 2016-11-30 | 4,9  | 0,9  |
| 2016-11-30 | 4,9  | 0,9  |
| 2016-12-01 | 1,7  | 7    |
| 2016-12-02 | -0,6 | -0,4 |
| 2016-12-05 | 4,8  | 5    |
| 2016-12-06 | -1,3 | -2,4 |
| 2016-12-09 | 7,3  | 7,9  |
| 2016-12-10 | 10,5 | 8,6  |
| 2016-12-11 | 6,4  | 6,2  |
| 2016-12-12 | -1   | -4   |
| 2016-12-12 | -1   | -4   |
| 2016-12-14 | 0    | -1   |

|            |      |      |
|------------|------|------|
| 2016-12-14 | 0    | -1   |
| 2016-12-14 | 0    | -1   |
| 2016-12-15 | -4   | -2,5 |
| 2016-12-16 | 1    | 0,5  |
| 2016-12-17 | 0    | 0,5  |
| 2016-12-17 | 0    | 0,5  |
| 2016-12-18 | 4    | 2,5  |
| 2016-12-22 | 5    | 4,5  |
| 2016-12-23 | 3,7  | 5,7  |
| 2016-12-26 | 8,7  | 3,5  |
| 2016-12-27 | 6,1  | 3    |
| 2016-12-27 | 6,1  | 3    |
| 2016-12-28 | -2,2 | -2,2 |
| 2016-12-29 | 3,3  | 3,9  |
| 2016-12-30 | 0,2  | 4,8  |
| 2016-12-30 | 0,2  | 4,8  |
